# Supplementary material for: Germinated and non-germinated cooked whole millet (Pennisetum glaucum (L.) R. Br.) flours show a promising effect on protein quality, biochemical profile and intestinal health in vivo
Source: Royal Society of Chemistry journal article supplement (doi:10.1039/d2fo02915d), 2023-01-01
Supplement: d2fo02915d1.pdf [file d2fo02915d1.pdf]

## Supplementary material

1  
2  
3  
4  
5  
6  
7  
8  
9  
10  
11  
12  
13  
14  
15  
16  
17  
18  
19  
20  
21  
22  
23  
24  
25  
26  
27  
28  
29  
30  
31

**Germinated and non-germinated cooked whole millet (*Pennisetum glaucum* (L.) R. Br.) flours shows promising effect on protein quality, biochemical profile and intestinal health *in vivo***

Thauana Lorena Silva Magalhães <sup>a</sup>, Bárbara Pereira da Silva <sup>a</sup>, Mariana Grancieri <sup>a</sup>, Haira Guedes Lúcio <sup>a</sup>, Renata Celi Lopes Toledo <sup>a</sup>, Roberta Ribeiro Silva <sup>b</sup>, Carlos Wanderlei Piler de Carvalho <sup>c</sup> and Hércia Stampini Duarte Martino <sup>a\*</sup>

<sup>a</sup> Department of Nutrition and Health. Universidade Federal de Viçosa. Av. Purdue, s/n, Campus Universitário, Viçosa – MG, Brazil, Zip Code: 36.570-900. E-mail: thauana.magalhaes@ufv.br; barbarapereira2805@gmail.com; mariana.grancieri@ufv.br; haira.lucio@ufv.br; renatacelly@yahoo.com.br; hercia@ufv.br

<sup>b</sup> Department of Nutrition, Universidade Federal de Alfenas, Alfenas – MG, Brazil, Zip Code: 37130-000. E-mail: betaribeiro@hotmail.com

<sup>c</sup> Embrapa Agroindústria de Alimentos. Av. das Américas, nº 29.501, Guaratiba, Rio de Janeiro – RJ, Brazil, Zip Code: 23.020-470. E-mail: carlos.piler@embrapa.br

\* Corresponding author: e-mail: hercia@ufv.br; Phone: +55-31-3612-5188; Fax number: +55-31-3899-2541.

32 **Supplementary Table 1** Composition of the experimental diets.

| Ingredients (g/100g)               | Experimental diets |          |       |       |
|------------------------------------|--------------------|----------|-------|-------|
|                                    | CC                 | Aproteic | NM    | GM    |
| Casein*                            | 12.02              | 0.00     | 3.00  | 3.00  |
| Germinated millet flour            | 0.00               | 0.00     | 0.00  | 55.58 |
| Conventional millet flour          | 0.00               | 0.00     | 55.31 | 0.00  |
| Dextrinized starch                 | 13.20              | 13.20    | 13.20 | 13.20 |
| Corn starch                        | 45.74              | 57.76    | 7.78  | 8.54  |
| Sucrose                            | 10.00              | 10.00    | 10.00 | 10.00 |
| Soybean oil                        | 7.00               | 7.00     | 4.70  | 4.58  |
| Fiber (microcrystalline cellulose) | 6.99               | 6.99     | 0.96  | 0.05  |
| Mineral mix                        | 3.50               | 3.50     | 3.50  | 3.50  |
| Vitamin mix                        | 1.00               | 1.00     | 1.00  | 1.00  |
| L-cystine                          | 0.30               | 0.30     | 0.30  | 0.30  |
| Choline bitartrate                 | 0.25               | 0.25     | 0.25  | 0.25  |
| <b>Composition of diets (%)</b>    |                    |          |       |       |
| Carbohydrates                      | 68.90              | 68.90    | 68.90 | 68.90 |
| Proteins                           | 9.50               | 9.50     | 9.50  | 9.50  |
| Lipids                             | 7                  | 7        | 7     | 7     |
| <b>Caloric density (kcal/g)</b>    | 3.8                | 3.9      | 3.7   | 3.6   |

33 Composition of the experimental diets based on the standard rodent diet (AIN-93G). CC (casein control diet); Aproteic (free  
 34 protein diet); NM (non-germinated millet diet); GM (germinated millet diet). \*Casein based on 79% protein content.

35

36

37

38

39

40 **Supplementary Table 2** Essential amino acid profile, chemical score (score AA), and PDCAAS according to the standard FAO  
 41 <sup>1</sup> of the experimental diets.

| Amino acids                     | (mg/g protein) |        |        | Standard FAO<br>(2013) | Score AA |      |      | PDCAAS |       |       |
|---------------------------------|----------------|--------|--------|------------------------|----------|------|------|--------|-------|-------|
|                                 | CC             | NM     | GM     |                        | CC       | NM   | GM   | CC     | NM    | GM    |
| <b>Tryptophan</b>               | 11.54          | 14.24  | 13.71  | 11.00                  | 1.36     | 1.68 | 1.61 | -      | -     | -     |
| <b>Lysine</b>                   | 68.67          | 41.04  | 39.69  | 58.00                  | 1.20     | 0.72 | 0.70 | -      | 61.50 | 58.33 |
| <b>Histidine</b>                | 29.96          | 27.58  | 26.21  | 21.00                  | 1.50     | 1.38 | 1.31 | -      | -     | -     |
| <b>Threonine</b>                | 46.38          | 42.46  | 40.55  | 34.00                  | 1.50     | 1.37 | 1.31 | -      | -     | -     |
| <b>Methionine + Cysteine</b>    | 21.68          | 79.95  | 73.58  | 25.00                  | 0.80     | 2.96 | 2.73 | 76.50  | -     | -     |
| <b>Valine</b>                   | 65.04          | 59.06  | 57.80  | 35.00                  | 1.51     | 1.37 | 1.34 | -      | -     | -     |
| <b>Isoleucine</b>               | 51.88          | 45.87  | 46.02  | 28.00                  | 1.62     | 1.43 | 1.44 | -      | -     | -     |
| <b>Leucine</b>                  | 104.72         | 105.08 | 103.70 | 66.00                  | 1.59     | 1.59 | 1.57 | -      | -     | -     |
| <b>Phenylalanine + Tyrosine</b> | 72.90          | 86.93  | 85.21  | 63.00                  | 1.40     | 1.67 | 1.64 | -      | -     | -     |

42 CC (diet of casein control group); NM (diet of non-germinated millet group); GM (diet of germinated millet group); Score de  
 43 AA (quotient of the division between the mg of aa/g protein CC, NM or GM and the mg of aa/g protein standard FAO);  
 44 Standard FAO (2013) <sup>1</sup> (United Nations Food and Agriculture Organization (FAO), theoretical standard for essential amino  
 45 acids for children aged 6 months to 3 years); PDCAAS (multiplication between the 1st amino acid limited and the true  
 46 digestibility of experiment with rats). True Digestibility: CC = 95.27; NM = 85.42; GM = 83.77.

47  
 48  
 49  
 50  
 51  
 52  
 53  
 54  
 55  
 56  
 57

58 **Reference**
